# Supplementary material for: A method to construct a points system to predict cardiovascular disease considering repeated measures of risk factors
Source: PeerJ. 2016 Feb 15;4:e1673. doi: 10.7717/peerj.1673 (PMC4756731; doi:10.7717/peerj.1673)
Supplement: Supplemental Information 3 [file peerj-04-1673-s003.xlsx]

## Sheet: Risk score
	Model parameters					Event probability
	Betas	Mean				Points	Probability
Age	0.084585	48.8519				0	0.0261257		Low	<1%
SBP	0.008738	135.323				1	0.039876
HbA1c	0.187552	6.19146				2	0.0608611
ratio	0.190759	4.63569				3	0.0928847
male	0.479261	0.43783				4	0.141746
smoker	0.72064	0.308289				5	0.216284
						6	0.329952
B	0.422925					7	0.503207
						8	0.767088
SUM_MEAN	7.79211					9	1.16853		Medium	1-4%
						10	1.77817
S0(2*365)	0.991042					11	2.7015
						12	4.09417
Age (years)	Reference	Points				13	6.18164		High	5-9%
18-29	23.5	0				14	9.28072
30-39	34.5	2.2				15	13.815		Very high	>10%
40-49	44.5	4.2				16	20.303
50-59	54.5	6.2				17	29.2773
60-69	64.5	8.2				18	41.0663
70-79	74.5	10.2				19	55.3852
>=80	84.5	12.2				20	70.8286
						21	84.7489
SBP (mmHg)	Reference	Points				22	94.3327
<120	102.5	0
120-139	129.5	0.557844
140-159	149.5	0.971061
160-179	169.5	1.38428
>=180	200	2.01444
HbA1c (%)	Reference	Points
<5.7	4.8	0
5.7-6.4	6.05	0.55433
>=6.5	8.7	1.72951
Ratio (TC/HDL-c)	Reference	Points
<3	2.46	0
3-3.99	3.495	0.466834
4-4.99	4.495	0.91788
5-5.99	5.495	1.36893
6-6.99	6.495	1.81997
>=7	8.92	2.91376
Male
No	0	0
Yes	1	1.13321
Smoker
No	0	0
Yes	1	1.70394
